# Supplementary material for: Focal Chromosomal Copy Number Aberrations Identify CMTM8 and GPR177 as New Candidate Driver Genes in Osteosarcoma
Source: PLoS One. 2014 Dec 31;9(12):e115835. doi: 10.1371/journal.pone.0115835 (PMC4281204; doi:10.1371/journal.pone.0115835)
Supplement: S1 Table — Expression fold change for all genes in focal losses (upper panel) or focal gains (lower panel) in 31 osteosarcoma samples. Green: expression fold change (FC) <0.75 of the gene in the tumor relative to osteoblasts (underexpression). Red: expression fold change (FC) >1.50 of the gene in the tumor relative to osteoblasts (overexpression). For each gene, the number (n) and fraction (%) of osteosarcomas with the indicated fold change (FC) are given. (XLSX) [file pone.0115835.s002.xlsx]

## Sheet: Tabel S1 in artikel
		ILMN_GENE	IQCA	ERBB4	THRB	CMTM8	OXSR1	DNAH12L	FHIT	ADAMTS3	FAM13A1	ODZ3	ANKRD55	PDE4D	MSH3	CAMK4	FBXL21	LECT2	EBF1	RANBP17	SNX14	NT5E	WASF1	CENTA1 (ADAP1)	TMEM195	DOCK5	RFX3	SPINK4	APBA1	AGTPBP1	C10ORF97	GPR158	ZNF248	PPA1	ADAMTS14	PTEN	NHLRC2	DCLRE1A	TACC2	NSMCE4A	ATE1	NELL1	CUGBP1	RAPSN	PSMC3	SLC39A13	SLC36A4	DYNC2H1	INCA (CARD17).
		CHROMOSOME	2	2	3	3	3	3	3	4	4	4	5	5	5	5	5	5	5	5	6	6	6	7	7	8	9	9	9	9	10	10	10	10	10	10	10	10	10	10	10	11	11	11	11	11	11	11	11
		PROBE_ID ILMN_	2080684	1653728	1696683	1710124	1811489	2134416	1766123	1703803	1752510	2336094	2341724	1791483	2077130	2166582	1717252	1717557	1778681	1753092	2361575	1697220	1756079	2047511	1812678	1752455	2238640	1681263	1668285	2223922	1725594	1727093	1662192	1805827	1873412	1701134	1698715	1734096	2363165	1679134	2381769	1745817	2382083	1724806	1809010	1730937	2082324	2343310	1707979
Genes in focal losses	Samples	OS1	0.99722	0.84749	0.895667	0.515124	0.493508	0.961541	1.17837	1.01381	2.90375	1.8179	0.814194	0.895589	1.14321	0.958555	0.982258	1.09188	1.23396	1.08463	1.03298	0.375273	1.01495	2.36566	1.05505	0.682142	1.04888	0.991493	1.00606	0.99094	1.59833	1.09793	1.13222	0.483212	1.10594	0.384451	1.1121	1.31419	0.701355	1.04639	0.957634	0.948244	0.981366	0.740189	2.0992	0.962565	1.53288	1.1708	1.01561
		OS2	1.01601	0.725049	0.925943	0.579257	0.408616	0.840313	1.30421	0.852206	2.00277	1.25735	0.917253	1.14347	0.687662	1.07542	0.986982	1.01719	1.46122	0.931377	1.08738	0.409382	1.03389	2.44293	1.05563	0.732025	1.02714	1.09868	1.03527	1.01896	1.1028	0.979173	1.06047	0.728525	1.0014	0.915108	1.01732	1.12813	0.76666	1.51676	0.888246	1.06663	0.858287	0.742977	0.854645	0.978121	0.904371	0.865758	1.05955
		OS3	0.880346	0.866315	0.849796	0.710868	0.779485	0.886594	1.4226	0.881254	1.78519	0.303013	0.825071	3.66398	0.590621	1.06584	0.880987	0.883416	1.15285	0.958098	1.06758	0.449941	1.14702	1.49391	1.09272	0.589047	1.03185	0.997814	1.10165	0.964897	1.31903	1.07488	0.952753	1.05997	1.02513	0.532688	1.102	0.889303	3.83331	1.27363	1.60807	1.15348	0.80243	3.0577	1.1713	0.968096	0.771091	0.829317	1.13506
		OS4	0.866357	0.610098	0.913201	1.29719	0.454947	0.946071	1.33976	0.832421	1.69919	0.465389	0.821363	0.799259	0.583332	1.02018	1.03382	1.03531	0.59766	1.11882	1.2126	0.493496	1.08991	1.96925	0.973377	0.602121	0.997289	1.07621	1.27831	1.00992	1.13608	1.10634	0.866906	0.943351	1.08833	0.435595	1.22225	1.49101	0.734331	1.35323	0.959489	0.965227	0.809243	0.730153	1.39159	0.740968	1.63618	0.924138	0.998734
		OS5	0.899046	0.70268	0.87627	0.597004	0.400268	0.910848	1.07142	0.993137	1.94559	0.746072	0.91551	1.0585	1.14897	0.976733	1.2386	0.979535	1.18429	1.07436	1.02317	0.371405	0.987452	3.85035	0.979786	0.695135	1.05828	1.0302	1.01994	1.06066	1.08649	1.04	1.19128	1.30189	1.03626	1.11576	1.16891	0.995589	0.81029	1.25221	0.937426	1.39	0.828271	0.654556	0.900344	0.839977	1.25034	0.891102	1.09254
		OS6	0.982623	0.721644	0.957859	0.560682	0.35057	0.880471	1.02379	0.933083	2.166	0.545198	0.871335	0.993587	2.40418	0.912767	1.12477	0.967563	1.45003	1.01781	1.10812	0.381081	0.9868	3.56973	1.10447	0.758406	0.932554	0.960455	1.07179	0.957074	1.2347	1.03915	1.04816	1.14288	1.10958	1.07006	1.58355	1.46829	0.810563	1.56722	0.923388	1.08232	1.13653	0.715728	0.746685	0.890798	1.51309	1.03306	1.04236
		OS8	1.12777	0.801233	1.06437	0.481248	0.377285	0.99935	1.15457	0.864373	2.2264	0.73066	0.874465	0.743703	0.310765	0.960067	0.982914	0.996323	0.707382	1.06561	1.11645	0.273139	0.98763	15.0133	1.08912	0.687719	0.986467	1.02248	1.11884	0.981242	1.58986	1.06349	1.21927	1.48053	0.985402	0.910801	1.18261	1.15788	0.720409	0.94066	0.833315	1.40252	0.949422	0.848256	0.680399	0.893176	1.79556	0.876448	1.03579
		OS33	2.87499	0.752818	0.949566	0.510385	0.424864	0.936047	1.15676	0.883477	1.6732	0.510547	0.82747	1.05454	1.08825	0.946644	0.963483	1.03365	0.7391	1.01884	1.17912	0.976917	1.03624	3.49968	0.980775	0.725714	0.996065	0.993944	1.15753	0.939413	1.11252	1.05254	1.43697	0.746369	1.03322	1.04365	0.962654	1.29137	1.18636	1.43669	1.95927	4.09051	0.970392	0.776079	0.620797	1.20991	1.13926	1.1688	1.05074
		OS9	0.965125	0.687736	0.905642	0.559752	0.681792	0.922697	1.1689	1.02264	1.24091	0.293826	0.978655	0.731915	0.752851	0.979416	1.25097	1.11424	0.774477	0.956429	1.18591	0.357356	0.987185	11.5718	1.03554	0.590468	0.978043	1.03243	1.0879	1.00435	1.51321	0.948068	1.34083	1.05919	1.01537	0.635325	1.1688	1.49236	0.765014	1.20802	0.922126	1.03617	0.942339	0.738585	1.50393	0.939452	0.945886	0.824786	1.00585
		OS11	0.961137	0.760799	0.959479	0.49608	0.463601	0.892868	0.973266	1.07608	1.59496	1.45084	0.876339	0.809251	3.34307	0.999403	1.0122	1.11624	0.969053	1.12634	1.05797	0.516133	1.03225	2.95774	1.01969	0.765026	1.08429	1.04518	1.09153	1.00147	1.20812	1.05981	1.11369	1.20108	0.959735	0.695544	0.982726	1.10751	0.777471	1.09274	0.826072	1.19462	1.00832	0.922064	2.14688	0.994892	2.31053	1.27726	1.00466
		OS34	1.15725	0.78843	0.953903	0.791391	0.352092	0.917928	1.08896	0.958731	1.93747	0.490858	0.899615	1.11979	1.32561	0.955277	1.04961	0.941943	1.45267	1.02728	1.04695	0.49802	0.932894	6.23169	0.986112	0.704345	1.21165	1.01823	1.0899	0.904234	1.43013	1.06467	1.12479	1.10954	0.932422	0.831284	1.17187	0.988799	0.808504	1.74135	0.89259	0.977684	1.00778	0.872597	0.898415	1.0032	1.13878	1.13201	1.05955
		OS12	1.30861	0.772388	0.968541	0.763783	0.530796	1.04555	1.08468	0.923517	1.7415	0.450106	0.929827	1.21707	1.44473	0.918679	1.18228	0.94192	1.30331	0.971444	1.31002	0.616152	1.07679	2.88842	1.13847	0.736608	1.13232	0.998794	1.08713	0.894459	0.96143	1.03041	1.19641	1.63463	1.00221	1.34184	1.00936	0.970437	0.996761	1.47473	1.01184	1.65826	0.948378	0.750195	0.820573	0.906009	1.42429	1.04219	1.02929
		OS28	2.49035	0.86295	0.923763	0.469554	0.623234	0.89016	1.13895	0.914892	1.33758	1.69512	1.01224	1.31913	1.17243	1.04419	1.39045	1.07307	1.83305	0.949527	1.13325	0.381308	0.967825	1.05018	1.00226	0.716155	1.03889	1.0713	1.06134	1.10463	1.38042	1.06252	1.31753	1.44935	1.01604	1.72326	0.971586	1.0322	0.958785	1.5619	0.91834	3.23602	0.858209	0.717184	0.780367	1.01905	0.80786	1.10144	1.05855
		OS13	1.08758	0.902076	0.947181	1.07163	0.455153	0.969318	1.22683	0.89683	1.71626	1.94669	0.863579	0.811799	1.99881	1.00727	1.00162	0.95515	1.37693	1.0069	1.07383	0.387568	0.972656	1.69015	1.02097	0.654641	1.18547	1.01843	1.15432	0.985134	1.03821	1.04863	1.39934	1.235	1.05228	0.583713	1.06853	0.855356	0.774093	0.907356	0.894428	1.19221	0.83857	0.729767	0.832908	0.949335	1.25034	0.996018	1.08286
		OS14	1.1956	0.728083	0.905685	1.04524	0.399965	0.96456	1.04539	0.900531	1.39943	1.08297	0.894686	0.866087	2.78886	1.04127	1.02749	0.895471	2.00028	1.07466	1.12135	0.886738	0.951389	4.42038	1.01281	0.718401	1.03106	1.06215	1.05387	0.996532	1.74144	0.906613	1.06686	1.10246	1.04867	0.89055	1.19424	1.11875	0.874062	1.12292	0.964201	1.20029	0.836035	0.735952	0.660323	0.933501	0.922203	1.03662	0.930483
		OS15	0.961197	0.82721	0.997555	0.597476	0.313113	0.965054	1.02964	0.728973	2.42561	1.56288	0.86306	0.757301	4.13567	1.11205	1.13346	0.951905	1.12224	0.988873	1.14933	0.529376	1.13353	3.23995	1.05257	0.649575	0.959284	1.09928	1.16906	1.01544	0.879434	1.05386	1.18746	0.417915	1.13941	0.436773	1.23755	0.97779	0.738567	1.18307	0.884957	1.06216	0.836797	0.955098	1.09958	1.04365	0.883581	0.928598	1.07197
		OS16	1.01255	0.91789	0.996216	0.781853	0.467886	0.947779	1.18657	0.868424	1.81949	0.289623	1.37038	0.913493	2.30745	0.983236	0.919495	0.856362	1.35251	1.02232	1.05892	0.309839	0.993889	4.36492	1.15476	0.638256	1.13173	1.05855	1.08179	0.996071	1.19447	0.912727	1.11678	0.967325	1.06734	1.13777	1.06271	0.988691	0.800735	2.08754	0.886937	0.999792	0.728138	0.787593	0.664559	1.03013	0.907328	1.023	1.02995
		OS18	1.01802	0.806202	0.909754	1.49409	0.604172	1.01387	1.31264	0.987121	1.17031	0.308553	0.912338	0.912428	1.38265	0.988258	1.09511	0.877485	0.915507	0.987655	1.0356	0.518643	1.0439	1.25252	1.03175	0.665364	1.07907	1.09404	1.09601	0.926207	2.26691	0.945676	1.52271	1.41552	0.942467	0.753854	1.13593	1.09067	0.747679	1.19209	0.877272	1.78127	0.897681	0.849829	0.452436	0.816531	0.965931	1.03977	1.0121
		OS19	0.9947	0.919909	0.970166	0.574216	0.464109	0.938208	1.11375	0.980878	1.45119	0.571337	0.868459	1.32818	2.49055	1.0954	1.08911	0.929521	1.42496	1.05232	1.1042	1.03448	1.11865	1.87191	1.04283	0.675622	1.11525	1.10404	1.06583	1.00323	1.34648	1.02565	1.03936	1.40858	0.960043	1.19712	1.06205	1.18946	0.834744	1.65046	0.984063	1.23283	0.984508	0.806291	0.772092	1.10712	1.38189	1.20656	0.996785
		OS20	1.00375	0.829805	1.17206	1.3328	0.415972	0.91925	1.02988	0.811701	1.43321	0.80636	0.8556	0.728648	2.21886	0.984175	1.40082	1.00646	0.675181	1.00057	1.0301	0.937759	0.963589	5.19771	1.08532	0.745432	1.01368	1.09975	1.05831	1.0264	2.7993	0.966006	0.964609	1.22394	0.983785	0.661658	0.985016	1.12932	0.816223	1.5801	0.844534	0.949624	0.751195	0.992568	1.03596	0.973814	1.30116	1.12984	0.984098
		OS35	1.09449	0.706777	0.8911	0.520606	0.363309	0.889669	1.20449	0.756332	2.24271	1.14654	0.903561	0.913657	2.26686	1.0604	0.964917	1.1292	1.61851	0.919775	1.039	0.408851	0.98814	3.96294	1.07091	0.684286	1.21967	1.02434	1.26732	1.06812	1.65578	0.992604	1.09948	0.804889	0.988786	0.807862	1.2105	1.17974	0.784328	0.958	0.89438	1.14713	0.891444	0.851307	1.03131	0.96507	1.30104	0.885599	1.09895
		OS36	0.918843	0.715462	0.920339	0.605626	0.287455	0.88291	1.14337	0.87912	1.60271	1.03467	0.830851	0.808144	2.61231	1.00672	1.15574	1.0301	0.905762	1.03519	1.02711	0.401851	1.06684	2.34973	1.06081	0.687387	1.13944	0.926551	1.16013	1.1796	1.72038	0.977363	1.53313	0.89139	0.965777	0.539464	1.2313	1.20457	0.924674	1.26818	0.918106	0.870352	0.947503	0.771316	0.948827	1.1057	1.43021	0.967143	1.00607
		OS37	0.973311	0.811521	0.893565	0.852503	0.478737	0.868981	1.07691	0.835705	2.11891	1.29248	0.878616	0.88594	1.29578	1.02396	0.994223	0.924333	1.56061	0.979521	1.05464	0.462124	0.99353	3.02165	1.2145	0.926368	1.1444	1.01052	1.03649	0.931769	2.5509	0.99376	1.11182	1.27619	0.939773	0.894612	1.18156	1.17716	0.86787	1.06917	1.15327	1.11943	1.04003	0.860164	0.814737	0.945645	1.61538	1.37907	1.04539
		OS38	1.03785	0.761599	1.09179	0.478354	0.457242	0.92705	1.09105	0.892922	3.07111	0.68113	0.854415	0.807952	1.51247	0.9942	1.05989	0.87547	1.35719	1.00881	1.08345	0.449995	0.963489	9.23966	1.03736	0.70259	1.11582	1.18125	1.0915	1.10166	1.7778	0.886868	0.848104	1.22751	1.08646	0.726706	1.32388	0.96563	0.806387	1.06729	1.01081	1.37602	1.08207	0.897086	0.816772	1.13743	1.56597	1.13023	1.02161
		OS39	1.09067	0.778494	0.923011	0.731413	0.601231	0.989544	0.982369	0.92253	2.88497	1.07602	0.859646	0.950346	0.719682	0.990507	1.16759	0.99468	1.49697	1.07455	1.17132	0.63109	0.975784	4.35823	1.11049	0.621932	1.12455	1.02512	1.13676	1.04978	2.4335	1.147	0.962166	1.30636	0.924587	1.05951	1.32692	1.00334	0.807004	0.907835	0.954676	1.04123	1.04809	0.923413	1.02339	0.91756	1.26559	0.982587	1.00954
		OS40	1.07056	0.735415	0.943017	0.730477	0.354472	0.947728	1.0697	0.817623	2.45387	0.70803	0.900948	0.866647	2.77088	1.05085	1.02578	0.844269	1.00138	0.912877	1.17715	0.483347	1.09402	2.71276	0.988696	0.696324	1.06371	1.01789	1.08653	1.08868	0.979088	1.06889	0.991521	1.16672	1.01486	0.611948	1.26184	1.13063	0.972963	2.20161	0.887659	1.0524	0.892504	0.940835	0.820082	0.862142	1.2946	0.992413	1.17026
		OS41	0.994121	0.684633	0.913159	0.655763	0.417581	0.88041	1.2372	0.866223	1.67682	0.327372	0.970554	0.821994	1.64637	1.02497	1.01561	1.10349	1.19853	1.00858	1.08414	0.442968	1.02296	2.43832	1.00219	0.797592	0.987491	1.10295	1.11741	0.945354	0.955918	0.920347	0.998636	1.0848	1.11616	0.936381	1.2802	1.10803	1.02684	1.34383	1.01042	1.12124	0.989879	0.88494	0.625229	0.872341	1.23918	1.14971	1.09421
		OS42	0.815696	0.726145	1.18314	0.530315	0.415561	0.920904	1.0289	0.952521	1.60605	0.660578	0.939256	0.889054	0.400536	1.20851	1.14146	0.99288	0.79563	0.961674	1.03758	0.647689	1.02551	2.86235	0.949101	0.751059	1.02561	0.955657	1.01079	0.950087	1.10583	0.93781	0.917588	2.177	0.963538	0.468649	1.24748	0.908845	0.745438	0.641788	1.04805	0.995608	1.43906	0.903628	0.967728	0.884159	1.81066	1.13381	1.10854
		OS43	0.923048	0.766538	0.925756	0.746191	0.435967	0.950534	1.03153	0.8887	1.66079	0.72563	0.80906	0.803387	2.2915	0.965194	0.97312	0.891848	1.96224	1.02149	1.03007	1.09839	1.11911	3.33976	0.95431	0.782538	1.12063	1.00663	1.13159	1.03936	0.954782	0.953243	1.02788	1.48535	1.11293	0.815458	1.06389	0.992084	0.944763	1.97223	1.47231	1.00134	1.01761	1.13187	0.670731	1.00827	0.938664	1.04135	1.10654
		OS44	1.01292	0.762616	0.888299	0.979356	0.569036	0.922248	1.05516	0.883644	1.8292	0.299238	0.886595	2.67628	2.0227	1.00854	0.916782	0.914275	1.59348	1.12716	1.0905	0.480127	1.08011	1.38373	0.998709	0.732076	1.03519	1.15639	0.966739	0.976819	1.32863	0.924674	0.874948	1.12772	1.02593	0.725584	1.14655	0.77646	3.56614	1.7826	2.4844	1.2987	0.804542	4.6506	1.27183	0.849474	0.794531	0.951861	0.948548
		OS46	0.947405	0.783611	0.90141	0.518406	0.382834	0.942094	1.27185	0.887006	1.47147	0.68548	0.838982	1.06749	1.38265	1.05495	1.05271	1.00948	0.631238	1.02657	0.990553	0.384834	0.980195	2.86388	1.04188	0.650466	0.929245	1.08304	1.12394	0.981159	1.49148	0.922511	0.933249	1.25188	1.02387	0.673919	0.987693	0.962495	0.699589	0.674243	0.875128	0.938889	0.964257	0.843661	0.823828	0.92329	1.18692	1.19667	1.01391
		FC < 0.75 n (%)	0	11 (35.48	0	21 (67.74)	30 (96.77)	0	0	1 (3.23)	0	19 (61.29)	0	3 (9.68)	6 (19.35)	0	0	0	5 (16.13)	0	0	26 (83.87)	0	0	0	25 (80.65)	0	0	0	0	0	0	0	4 (12.90)	0	14 (45.16)	0	0	7 (22.58)	2 (6.45)	0	0	1 (3.23)	9 (29.03)	8 (25.81)	1 (3.23)	0	0	0
		ILMN_GENE	GPR177	NBPF11	IQWD1	NRXN1	RPRM	GALNT13	CD83	SUPT3H	ZNF679	FAM91A1	ADCY8	YTHDF3	TMEM75	POU5F1P1	PLEC1	MYC	RTN1	UQCRFS1	POP4	PLEKHF1	C19ORF12
		CHROMOSOME	1	1	1	2	2	2	6	6	7	8	8	8	8	8	8	8	14	19	19	19	19
		PROBE_ID ILMN_	1660549	1662845	2392080	1781398	1665425	1738869	2328666	2274199	1666420	1777322	1754440	1657470	2224765	2068498	1744268	2110908	1756928	1701749	1696383	1708041	1664920
Genes in focal gains	Samples	OS1	1.1602	1.02687	1.19563	0.948443	0.863637	0.952456	1.54921	1.59369	0.858683	0.879677	0.928695	1.89346	1.09447	1.04678	0.347976	1.4404	1.25602	0.3966	0.987729	0.438307	0.543288
		OS2	2.08519	1.14566	1.41658	0.994252	1.74253	1.37396	2.2692	1.026	0.850784	1.33479	1.07921	1.20012	1.06342	0.937474	0.301671	0.873933	1.96075	4.8753	3.26982	5.72489	4.70137
		OS3	0.764901	1.13782	4.64011	1.0176	1.11972	1.04463	1.0621	1.04291	1.00893	0.688118	1.01067	1.11818	1.12876	0.893403	0.78972	0.698922	1.43278	3.73285	0.911276	3.85914	1.83872
		OS4	1.65381	1.18183	1.1655	1.03632	1.08573	1.11688	2.25813	1.76632	1.01252	1.03057	0.975468	0.803808	1.10166	0.90805	0.380028	1.02343	1.19454	1.07417	1.35814	1.2064	1.13805
		OS5	1.64251	1.04104	1.20239	1.04782	10.8348	1.13685	2.10979	1.12104	1.08639	1.227	0.977105	0.936728	1.14153	1.0547	0.298247	1.02974	1.54483	1.84548	1.69348	2.40151	1.6866
		OS6	2.32943	1.18012	1.17487	0.879266	1.5269	0.961863	1.31088	1.31547	1.04465	1.73842	0.934245	0.795657	1.09039	0.950585	0.368078	1.20571	2.40063	2.77793	3.34523	0.902473	2.42535
		OS8	1.44022	1.00826	1.03479	1.0925	1.45007	0.967459	1.85694	1.04014	0.884699	1.85519	0.960609	0.876973	1.10341	0.918491	1.25064	3.06733	1.88206	3.57218	3.2743	0.715403	4.84422
		OS33	0.980243	1.0837	0.863259	0.951182	0.863586	1.0091	1.29788	1.13593	1.0515	1.02148	1.05107	0.794309	1.02209	0.943692	0.608737	1.44131	1.07496	1.17062	1.40826	0.799015	1.24118
		OS9	1.06	1.24506	1.02519	0.951182	1.47996	0.963087	2.19384	1.09083	1.04705	1.03431	1.09978	0.934595	1.01898	0.944086	0.286755	2.53689	2.74732	0.650092	1.08149	0.384961	0.413665
		OS11	1.55095	1.07537	1.42136	1.00877	1.07393	1.01381	3.61715	1.19992	1.09783	0.953456	0.987822	0.904212	1.06227	0.961994	0.574253	1.56481	1.06442	0.729191	1.28438	0.372249	0.841143
		OS34	1.01927	1.06786	1.11432	0.948666	0.903438	1.04484	2.28176	1.27726	1.00609	0.980584	1.08278	0.828345	1.02457	1.02012	0.238295	0.84522	1.63983	1.00197	1.56638	0.636117	0.77971
		OS12	1.02692	1.20933	1.18493	0.975788	1.08167	1.08557	2.22165	1.01158	1.14736	1.05218	0.920922	1.10997	1.04678	1.15626	0.68096	2.37964	1.69176	1.49963	1.68902	0.748472	1.63988
		OS28	0.761961	1.21011	0.992083	1.00521	1.04847	0.956071	1.46534	1.33116	0.989607	0.974596	0.973617	1.00737	1.13654	1.16966	0.294961	2.34196	1.04125	0.873018	1.09345	0.433169	0.666817
		OS13	0.81026	1.12894	1.03506	0.918575	1.20036	1.07184	1.3458	1.2336	0.939032	0.91946	1.08149	1.25926	1.08704	1.11598	0.377083	1.81591	2.31361	0.516846	0.937758	0.322588	0.338811
		OS14	1.59585	1.09628	1.10624	1.02271	0.886345	0.97728	1.99846	1.09397	0.931309	0.971959	1.029	0.854548	1.1132	0.992096	0.566604	0.754661	1.82049	0.672208	1.05277	0.93085	0.578506
		OS15	1.42335	1.14099	0.874865	0.881744	0.90434	1.01217	1.75508	1.29775	0.923463	0.945896	0.982179	0.923337	1.09581	1.01241	0.862474	0.779607	2.84847	0.757507	1.25746	0.319008	0.569192
		OS16	0.877492	1.18074	1.15517	0.994357	0.863828	0.983278	6.53227	1.38515	0.909024	0.799145	0.985982	0.939304	1.20163	0.964259	0.374796	1.1507	3.5397	0.764252	1.12851	1.10408	0.598209
		OS18	1.93172	1.17101	0.992677	1.03197	0.976266	1.01293	1.58529	1.03104	0.860178	1.08682	1.03775	0.940661	1.06741	0.987389	0.360042	1.49787	1.84894	1.06903	1.24768	0.575213	0.656084
		OS19	1.79839	1.06383	1.2376	0.929224	0.965933	1.04802	1.15528	1.43275	0.919516	0.896105	0.989686	1.12346	1.05899	0.983946	1.45184	2.83848	1.1785	1.05149	0.99123	1.23437	0.914859
		OS20	0.753587	1.11859	1.49276	0.98703	1.09922	0.94528	1.2389	1.52751	0.870587	0.926542	0.986972	0.909093	0.995719	1.07072	0.594197	0.867827	1.29995	0.828507	0.941223	0.777918	0.66417
		OS35	2.45318	1.031	1.22349	1.03719	0.809866	0.896488	1.75914	1.4005	1.1258	1.20792	1.00891	0.881398	1.02476	0.864286	0.383956	2.00959	2.45087	2.75141	5.19475	1.56564	2.86719
		OS36	1.98209	1.15201	1.05599	0.922652	1.03023	1.00744	1.71118	1.3386	1.19543	1.24071	0.983955	0.907268	0.988915	1.03359	0.424691	1.6473	2.65881	0.942519	1.11853	0.592074	0.765144
		OS37	2.58229	1.27666	1.37376	0.985672	0.851068	0.946399	2.46086	1.41018	0.974045	1.34059	1.20251	1.23351	1.09774	1.01539	0.513403	2.62199	1.45621	1.0787	1.50811	0.410094	0.719127
		OS38	0.991249	1.11678	1.27789	1.0077	1.26341	0.974125	1.42096	1.64177	0.985844	1.73261	1.51467	1.14611	1.01154	0.888387	0.388975	3.43876	1.69475	0.854608	1.14571	0.487642	0.888757
		OS39	2.32173	1.06214	1.48343	0.99601	0.972614	0.994516	2.14436	1.22507	0.886231	1.44277	0.862091	1.23485	1.01017	0.980374	0.486352	4.01402	1.1572	0.954029	1.69702	0.442915	0.704591
		OS40	3.31885	1.11972	1.20195	0.944167	1.17941	1.01372	1.64713	0.998138	1.01636	1.13511	0.959444	1.12941	1.0992	0.94167	0.475379	1.32709	1.73405	1.3579	1.30596	0.571214	1.50783
		OS41	1.48578	1.17513	1.14794	1.01375	1.03518	1.06602	2.35155	1.28341	1.01801	1.30903	0.937484	0.891207	1.07882	0.887907	0.450199	1.23908	2.2236	0.979688	1.01308	0.697515	0.63856
		OS42	1.74399	1.06147	1.18476	0.942308	1.49899	1.08278	2.77836	1.3614	0.886294	1.26636	0.940247	0.951499	1.08542	1.05945	0.527332	4.99604	1.05774	2.1362	1.85067	3.2526	2.64039
		OS43	0.751749	1.17785	1.26028	1.02005	0.909887	1.03544	2.68848	1.02863	0.906828	0.851222	1.0846	0.872484	1.07433	0.955181	0.593236	0.977859	3.23771	1.12759	0.969017	1.81385	1.00697
		OS44	0.863005	1.04934	4.46422	1.11531	0.952923	1.04627	1.8664	1.04299	0.865628	0.741171	0.920016	0.981686	1.16589	1.03499	0.493993	1.04872	1.31755	4.43687	1.06044	2.0233	1.46307
		OS46	2.2527	1.15194	1.1611	1.12848	0.853573	1.05051	1.65226	1.24243	0.894259	1.25903	1.33393	1.28244	1.06552	1.01033	0.392487	3.0701	1.30634	3.35654	3.38763	1.51798	3.09539
		FC > 1.50 n (%)	15 (48.39)	0 (0.00)	2 (6.45)	0 (0.00)	3 (9.68)	0 (0.00)	23 (74.19)	4 (12.90)	0 (0.00)	3 (9.86)	1 (3.23)	1 (3.23)	0 (0.00)	0 (0.00)	0 (0.00)	14 (45.16)	18 (58.06)	9 (29.03)	11 (35.48)	8 (25.81)	9 (29.03)
[truncated: 17 more columns]
